# Supplementary material for: Overcoming the out-of-plane bending issue in an aromatic hydrocarbon: the anharmonic vibrational frequencies of c-(CH)C3H2+
Source: Royal Society of Chemistry journal article supplement (doi:10.1039/d0cp01889a), 2020-01-01
Supplement: d0cp01889a1.pdf [file d0cp01889a1.pdf]

# Supplementary Information for Overcoming the Out-of-plane Bending Issue in an Aromatic Hydrocarbon: The Anharmonic Vibrational Frequencies of c-(CH)C<sub>3</sub>H<sub>2</sub><sup>+</sup>

Brent R. Westbrook, Weston A. Del Rio, Timothy J. Lee, and Ryan C.  
Fortenberry\*

*Department of Chemistry & Biochemistry, University of Mississippi, University, MS  
38677-1848*

E-mail: r410@olemiss.edu

Table S1: Fermi and Coriolis resonances for c-(CH)C<sub>3</sub>H<sub>2</sub><sup>+</sup>

| Coriolis                   | Fermi 1          | Fermi Polyad                                                                                      |
|----------------------------|------------------|---------------------------------------------------------------------------------------------------|
| A-type $\nu_{10}/\nu_8$    | $2\nu_5 = \nu_1$ | $2\nu_5 = \nu_{15} + \nu_3 = \nu_2$                                                               |
| B-type $\nu_{11}/\nu_8$    |                  | $2\nu_7 = 2\nu_8 = \nu_7 + \nu_6 = \nu_4$                                                         |
| C-type $\nu_{12}/\nu_9$    |                  | $\nu_{12} + \nu_6 = \nu_{12} + \nu_7 = 2\nu_7 = 2\nu_8 = 2\nu_9 = \nu_5$                          |
| B-type $\nu_{12}/\nu_{10}$ |                  | $\nu_{14} + \nu_{10} = \nu_{15} + \nu_8 = \nu_6$                                                  |
|                            |                  | $\nu_{15} + \nu_8 = \nu_{15} + \nu_9 = \nu_7$                                                     |
|                            |                  | $2\nu_{13} = 2\nu_{14} = \nu_{14} + \nu_{11} = \nu_{15} + \nu_{12} = \nu_{14} + \nu_{13} = \nu_8$ |
|                            |                  | $\nu_{15} + \nu_{12} = \nu_{14} + \nu_{13} = 2\nu_{14} = \nu_9$                                   |

Table S2: CCSD(T)-F12b/cc-pVTZ-F12 force constants for c-(CH)C<sub>3</sub>H<sub>2</sub><sup>+</sup>

|    |    |   |   |                  |    |    |    |   |                 |    |    |   |   |                  |
|----|----|---|---|------------------|----|----|----|---|-----------------|----|----|---|---|------------------|
| 15 | 15 | 0 | 0 | 0.122252888505   | 3  | 1  | 0  | 0 | -0.007474323084 | 6  | 6  | 6 | 0 | 0.002673872249   |
| 14 | 14 | 0 | 0 | 0.165280650564   | 2  | 1  | 0  | 0 | -0.160362248724 | 15 | 15 | 5 | 0 | 1.121061752673   |
| 14 | 13 | 0 | 0 | -0.564523346111  | 1  | 1  | 0  | 0 | 6.066255268228  | 14 | 14 | 5 | 0 | 0.798932776744   |
| 13 | 13 | 0 | 0 | 2.479023811431   | 15 | 14 | 11 | 0 | -0.008910454010 | 14 | 13 | 5 | 0 | -3.549161923571  |
| 14 | 12 | 0 | 0 | 0.005492791865   | 15 | 13 | 11 | 0 | -0.196937501344 | 13 | 13 | 5 | 0 | 154.671939619310 |
| 13 | 12 | 0 | 0 | -0.450313524753  | 15 | 12 | 11 | 0 | 0.191272297085  | 14 | 12 | 5 | 0 | 0.021207834103   |
| 12 | 12 | 0 | 0 | 0.697827512473   | 15 | 14 | 10 | 0 | -0.033931293137 | 13 | 12 | 5 | 0 | -1.792902099983  |
| 11 | 11 | 0 | 0 | 0.953265997830   | 15 | 13 | 10 | 0 | 0.118989461814  | 12 | 12 | 5 | 0 | 1.842813873516   |
| 11 | 10 | 0 | 0 | -0.025541501085  | 15 | 12 | 10 | 0 | -0.021305377091 | 11 | 11 | 5 | 0 | -0.481815572815  |
| 10 | 10 | 0 | 0 | 0.517403101537   | 15 | 14 | 9  | 0 | -0.006005147546 | 11 | 10 | 5 | 0 | 0.043017797033   |
| 11 | 9  | 0 | 0 | -0.980882598796  | 15 | 13 | 9  | 0 | -0.397463477690 | 10 | 10 | 5 | 0 | 1.045755143507   |
| 10 | 9  | 0 | 0 | 0.026038122388   | 15 | 12 | 9  | 0 | -0.227543126281 | 11 | 9  | 5 | 0 | 0.998719804963   |
| 9  | 9  | 0 | 0 | 1.092199027448   | 15 | 14 | 8  | 0 | -0.047271606231 | 10 | 9  | 5 | 0 | -0.046970353934  |
| 11 | 8  | 0 | 0 | 0.000722328798   | 15 | 13 | 8  | 0 | 0.152994188332  | 9  | 9  | 5 | 0 | -1.508268627747  |
| 10 | 8  | 0 | 0 | -0.025236626499  | 15 | 12 | 8  | 0 | -0.002183479338 | 11 | 8  | 5 | 0 | -0.005773236530  |
| 9  | 8  | 0 | 0 | -0.010861779714  | 15 | 14 | 7  | 0 | -0.082997548301 | 10 | 8  | 5 | 0 | -0.392287662541  |
| 8  | 8  | 0 | 0 | 5.823366669416   | 15 | 13 | 7  | 0 | 0.277878425677  | 9  | 8  | 5 | 0 | -0.005233341226  |
| 11 | 7  | 0 | 0 | 0.098389981110   | 15 | 12 | 7  | 0 | 0.001733900371  | 8  | 8  | 5 | 0 | -0.309143260699  |
| 10 | 7  | 0 | 0 | 0.178969764192   | 15 | 15 | 6  | 0 | 0.047224127966  | 11 | 7  | 5 | 0 | -0.384402927247  |
| 9  | 7  | 0 | 0 | 0.199060308983   | 14 | 14 | 6  | 0 | -0.046189951832 | 10 | 7  | 5 | 0 | -2.341967858473  |
| 8  | 7  | 0 | 0 | 0.057213893297   | 14 | 13 | 6  | 0 | 0.164544163573  | 9  | 7  | 5 | 0 | -0.160195190566  |
| 7  | 7  | 0 | 0 | 2.221584986770   | 13 | 13 | 6  | 0 | 1.784367989446  | 8  | 7  | 5 | 0 | 0.877322476133   |
| 6  | 6  | 0 | 0 | 0.563467825350   | 14 | 12 | 6  | 0 | -0.015040065785 | 7  | 7  | 5 | 0 | -24.526135686524 |
| 6  | 5  | 0 | 0 | 0.805193138436   | 13 | 12 | 6  | 0 | 0.182555483299  | 6  | 6  | 5 | 0 | 0.500040003936   |
| 5  | 5  | 0 | 0 | 45.128622402294  | 12 | 12 | 6  | 0 | -0.152193718615 | 6  | 5  | 5 | 0 | 2.538759273404   |
| 6  | 4  | 0 | 0 | -0.019427958406  | 11 | 11 | 6  | 0 | 0.088131645546  | 5  | 5  | 5 | 0 | 561.021691812892 |
| 5  | 4  | 0 | 0 | 0.193562953679   | 11 | 10 | 6  | 0 | -0.030940277041 | 15 | 15 | 4 | 0 | -0.057452661336  |
| 4  | 4  | 0 | 0 | 5.829365741285   | 10 | 10 | 6  | 0 | 0.012101926865  | 14 | 14 | 4 | 0 | -0.058930319359  |
| 6  | 3  | 0 | 0 | 0.171030147119   | 11 | 9  | 6  | 0 | -0.154797502660 | 14 | 13 | 4 | 0 | 0.197504509742   |
| 5  | 3  | 0 | 0 | -13.903977763997 | 10 | 9  | 6  | 0 | 0.014593577595  | 13 | 13 | 4 | 0 | -0.094144566849  |
| 4  | 3  | 0 | 0 | -0.082991934790  | 9  | 9  | 6  | 0 | 0.175310500109  | 14 | 12 | 4 | 0 | -0.002091227520  |
| 3  | 3  | 0 | 0 | 7.364834643513   | 11 | 8  | 6  | 0 | 0.006107558126  | 13 | 12 | 4 | 0 | 0.062692098334   |
| 6  | 2  | 0 | 0 | -0.266317224571  | 10 | 8  | 6  | 0 | -0.142926303873 | 12 | 12 | 4 | 0 | -0.051415498204  |
| 5  | 2  | 0 | 0 | 1.987091648964   | 9  | 8  | 6  | 0 | 0.008220994534  | 11 | 11 | 4 | 0 | -0.048964070471  |
| 4  | 2  | 0 | 0 | -0.016987435127  | 8  | 8  | 6  | 0 | -0.012256167994 | 11 | 10 | 4 | 0 | 0.008014078594   |
| 3  | 2  | 0 | 0 | 0.342807080518   | 11 | 7  | 6  | 0 | 0.086177233079  | 10 | 10 | 4 | 0 | -0.135247092822  |
| 2  | 2  | 0 | 0 | 13.760855687904  | 10 | 7  | 6  | 0 | -0.649465849463 | 11 | 9  | 4 | 0 | 0.052334833508   |
| 6  | 1  | 0 | 0 | -0.010635400339  | 9  | 7  | 6  | 0 | 0.014952552326  | 10 | 9  | 4 | 0 | 0.009928721069   |
| 5  | 1  | 0 | 0 | 0.018875834339   | 8  | 7  | 6  | 0 | -0.045320179636 | 9  | 9  | 4 | 0 | -0.035036376814  |
| 4  | 1  | 0 | 0 | 0.007745987883   | 7  | 7  | 6  | 0 | -0.214814284201 | 11 | 8  | 4 | 0 | -0.004494048581  |

Table S3: CCSD(T)-F12b/cc-pVTZ-F12 force constants for c-(CH)C<sub>3</sub>H<sub>2</sub><sup>+</sup>(cont.)

|    |    |   |   |                   |    |    |   |   |                  |    |    |   |   |                  |
|----|----|---|---|-------------------|----|----|---|---|------------------|----|----|---|---|------------------|
| 10 | 8  | 4 | 0 | -0.008197858458   | 5  | 4  | 3 | 0 | 0.398786123568   | 4  | 2  | 2 | 0 | 0.025864202368   |
| 9  | 8  | 4 | 0 | -0.002200049986   | 4  | 4  | 3 | 0 | 0.183708818283   | 3  | 2  | 2 | 0 | 0.158996926673   |
| 8  | 8  | 4 | 0 | -23.622044573339  | 6  | 3  | 3 | 0 | -0.168427108428  | 2  | 2  | 2 | 0 | -82.700313317017 |
| 11 | 7  | 4 | 0 | 0.015320546138    | 5  | 3  | 3 | 0 | 32.901476164588  | 15 | 15 | 1 | 0 | -0.002524257452  |
| 10 | 7  | 4 | 0 | -0.062802095185   | 4  | 3  | 3 | 0 | -0.182930498544  | 14 | 14 | 1 | 0 | -0.008109538833  |
| 9  | 7  | 4 | 0 | 0.012469874487    | 3  | 3  | 3 | 0 | -25.667131901971 | 14 | 13 | 1 | 0 | 0.026006181617   |
| 8  | 7  | 4 | 0 | 0.218560092385    | 15 | 15 | 2 | 0 | 0.015187631092   | 13 | 13 | 1 | 0 | -1.143888303554  |
| 7  | 7  | 4 | 0 | -0.459016881863   | 14 | 14 | 2 | 0 | -0.068827350866  | 14 | 12 | 1 | 0 | -0.001579731120  |
| 6  | 6  | 4 | 0 | -0.137305061880   | 14 | 13 | 2 | 0 | 0.212961016862   | 13 | 12 | 1 | 0 | 1.186402482364   |
| 6  | 5  | 4 | 0 | -0.446139489477   | 13 | 13 | 2 | 0 | -1.441974611656  | 12 | 12 | 1 | 0 | -1.293536399225  |
| 5  | 5  | 4 | 0 | -0.537431073382   | 14 | 12 | 2 | 0 | 0.040023966935   | 11 | 11 | 1 | 0 | -1.395749542144  |
| 6  | 4  | 4 | 0 | -0.012425215854   | 13 | 12 | 2 | 0 | 5.261223148595   | 11 | 10 | 1 | 0 | 0.020287333067   |
| 5  | 4  | 4 | 0 | -0.300857694560   | 12 | 12 | 2 | 0 | -4.568497527677  | 10 | 10 | 1 | 0 | -0.000634936128  |
| 4  | 4  | 4 | 0 | -23.630047671118  | 11 | 11 | 2 | 0 | 0.008969916428   | 11 | 9  | 1 | 0 | 1.422950568910   |
| 15 | 15 | 3 | 0 | -0.353412560291   | 11 | 10 | 2 | 0 | -0.062015963177  | 10 | 9  | 1 | 0 | -0.016971795832  |
| 14 | 14 | 3 | 0 | -0.126940709961   | 10 | 10 | 2 | 0 | 0.060202773878   | 9  | 9  | 1 | 0 | -1.461532586928  |
| 14 | 13 | 3 | 0 | 0.421972184689    | 11 | 9  | 2 | 0 | -0.027789571156  | 11 | 8  | 1 | 0 | -0.000926688112  |
| 13 | 13 | 3 | 0 | -43.669529940338  | 10 | 9  | 2 | 0 | 0.176064423563   | 10 | 8  | 1 | 0 | -0.000441557435  |
| 14 | 12 | 3 | 0 | -0.031894719802   | 9  | 9  | 2 | 0 | 0.038185382708   | 9  | 8  | 1 | 0 | 0.005084569607   |
| 13 | 12 | 3 | 0 | -0.770482973964   | 11 | 8  | 2 | 0 | -0.006618275958  | 8  | 8  | 1 | 0 | -0.000704712796  |
| 12 | 12 | 3 | 0 | 0.735263529112    | 10 | 8  | 2 | 0 | 0.024038443894   | 11 | 7  | 1 | 0 | -0.071493312667  |
| 11 | 11 | 3 | 0 | -0.265625648317   | 9  | 8  | 2 | 0 | -0.007627451108  | 10 | 7  | 1 | 0 | -0.005235298946  |
| 11 | 10 | 3 | 0 | -0.052559900238   | 8  | 8  | 2 | 0 | -0.036038459745  | 9  | 7  | 1 | 0 | 0.038034175425   |
| 10 | 10 | 3 | 0 | -0.508727319303   | 11 | 7  | 2 | 0 | 0.338828278880   | 8  | 7  | 1 | 0 | 0.011319998500   |
| 11 | 9  | 3 | 0 | 0.372718968216    | 10 | 7  | 2 | 0 | -0.135836949985  | 7  | 7  | 1 | 0 | 0.043335407505   |
| 10 | 9  | 3 | 0 | 0.045229120693    | 9  | 7  | 2 | 0 | -0.788077868386  | 6  | 6  | 1 | 0 | 0.000212559156   |
| 9  | 9  | 3 | 0 | -0.685442770671   | 8  | 7  | 2 | 0 | 0.181547828584   | 6  | 5  | 1 | 0 | -0.006156954184  |
| 11 | 8  | 3 | 0 | 0.008856587515    | 7  | 7  | 2 | 0 | -1.085012000134  | 5  | 5  | 1 | 0 | 0.010379893247   |
| 10 | 8  | 3 | 0 | 0.000634270678    | 6  | 6  | 2 | 0 | -0.007969792509  | 6  | 4  | 1 | 0 | 0.001717930793   |
| 9  | 8  | 3 | 0 | 0.021473437633    | 6  | 5  | 2 | 0 | 0.424646487659   | 5  | 4  | 1 | 0 | -0.005534956687  |
| 8  | 8  | 3 | 0 | 0.185151756039    | 5  | 5  | 2 | 0 | 0.314829416103   | 4  | 4  | 1 | 0 | -0.002534399851  |
| 11 | 7  | 3 | 0 | 0.025641846043    | 6  | 4  | 2 | 0 | 0.048474695624   | 6  | 3  | 1 | 0 | -0.004237130517  |
| 10 | 7  | 3 | 0 | 0.387896550193    | 5  | 4  | 2 | 0 | -0.049277327553  | 5  | 3  | 1 | 0 | 0.068887197389   |
| 9  | 7  | 3 | 0 | -0.206385827279   | 4  | 4  | 2 | 0 | -0.047420710142  | 4  | 3  | 1 | 0 | 0.002975452762   |
| 8  | 7  | 3 | 0 | -0.400227279927   | 6  | 3  | 2 | 0 | 0.156001644890   | 3  | 3  | 1 | 0 | 0.027064957731   |
| 7  | 7  | 3 | 0 | -7.754914486427   | 5  | 3  | 2 | 0 | -1.808080266638  | 6  | 2  | 1 | 0 | -0.005151964669  |
| 6  | 6  | 3 | 0 | -0.332870774515   | 4  | 3  | 2 | 0 | 0.073794136009   | 5  | 2  | 1 | 0 | -0.053196191212  |
| 6  | 5  | 3 | 0 | -0.654002459887   | 3  | 3  | 2 | 0 | -0.718793741576  | 4  | 2  | 1 | 0 | 0.002227231420   |
| 5  | 5  | 3 | 0 | -117.643468641947 | 6  | 2  | 2 | 0 | -0.031583365023  | 3  | 2  | 1 | 0 | -0.049481005080  |
| 6  | 4  | 3 | 0 | -0.034765715799   | 5  | 2  | 2 | 0 | 0.510787712883   | 2  | 2  | 1 | 0 | -0.014536590049  |

Table S4: CCSD(T)-F12b/cc-pVTZ-F12 force constants for c-(CH)C<sub>3</sub>H<sub>2</sub><sup>+</sup>(cont.)

|    |    |    |    |                   |    |    |    |    |                 |    |    |    |   |                 |
|----|----|----|----|-------------------|----|----|----|----|-----------------|----|----|----|---|-----------------|
| 6  | 1  | 1  | 0  | 0.002173176575    | 14 | 12 | 11 | 10 | -0.087632254427 | 11 | 10 | 9  | 9 | 0.074491447127  |
| 5  | 1  | 1  | 0  | 0.052926480373    | 13 | 12 | 11 | 10 | 0.116843005893  | 10 | 10 | 9  | 9 | -0.077320534833 |
| 4  | 1  | 1  | 0  | -0.002067095576   | 12 | 12 | 11 | 10 | -0.082109975779 | 11 | 9  | 9  | 9 | 0.274309626169  |
| 3  | 1  | 1  | 0  | -0.008666287862   | 11 | 11 | 11 | 10 | 0.014711207981  | 10 | 9  | 9  | 9 | -0.121063263632 |
| 2  | 1  | 1  | 0  | 0.213674760603    | 15 | 15 | 10 | 10 | -0.000490831584 | 9  | 9  | 9  | 9 | 0.013976538184  |
| 1  | 1  | 1  | 0  | -34.489892630633  | 14 | 14 | 10 | 10 | -0.056482573215 | 15 | 15 | 11 | 8 | 0.004387334952  |
| 15 | 15 | 15 | 15 | 0.201997800560    | 14 | 13 | 10 | 10 | 0.232515861672  | 14 | 14 | 11 | 8 | 0.003317656683  |
| 15 | 15 | 14 | 14 | 0.041046017391    | 13 | 13 | 10 | 10 | 2.778256833087  | 14 | 13 | 11 | 8 | 0.027139839992  |
| 14 | 14 | 14 | 14 | -0.006893855655   | 14 | 12 | 10 | 10 | -0.011043432488 | 13 | 13 | 11 | 8 | -0.153669544989 |
| 15 | 15 | 14 | 13 | -0.141429957659   | 13 | 12 | 10 | 10 | -0.114261203376 | 14 | 12 | 11 | 8 | -0.095806905027 |
| 14 | 14 | 14 | 13 | 0.030250243482    | 12 | 12 | 10 | 10 | 0.188399454175  | 13 | 12 | 11 | 8 | 0.084144403505  |
| 15 | 15 | 13 | 13 | 4.101029094938    | 11 | 11 | 10 | 10 | -0.003987752448 | 12 | 12 | 11 | 8 | 0.072846995472  |
| 14 | 14 | 13 | 13 | 2.376924828214    | 11 | 10 | 10 | 10 | -0.083979119240 | 11 | 11 | 11 | 8 | 0.000398737982  |
| 14 | 13 | 13 | 13 | -26.796972950773  | 10 | 10 | 10 | 10 | 0.271014718986  | 15 | 15 | 10 | 8 | 0.015757989725  |
| 13 | 13 | 13 | 13 | 1460.076453749885 | 15 | 15 | 11 | 9  | 0.101700114333  | 14 | 14 | 10 | 8 | 0.010435077210  |
| 15 | 15 | 14 | 12 | -0.015959672775   | 14 | 14 | 11 | 9  | -0.025517164776 | 14 | 13 | 10 | 8 | -0.049156898943 |
| 14 | 14 | 14 | 12 | -0.017236398368   | 14 | 13 | 11 | 9  | 0.146925720107  | 13 | 13 | 10 | 8 | -1.183612149616 |
| 15 | 15 | 13 | 12 | -0.181574034465   | 13 | 13 | 11 | 9  | 2.046009795982  | 14 | 12 | 10 | 8 | -0.006103739113 |
| 14 | 14 | 13 | 12 | -0.034197155371   | 14 | 12 | 11 | 9  | 0.085452347598  | 13 | 12 | 10 | 8 | -0.287747701101 |
| 14 | 13 | 13 | 12 | 0.254712253812    | 13 | 12 | 11 | 9  | -3.149529382919 | 12 | 12 | 10 | 8 | -0.080191756413 |
| 13 | 13 | 13 | 12 | -28.886427179603  | 12 | 12 | 11 | 9  | -2.533926004411 | 11 | 11 | 10 | 8 | -0.055869331107 |
| 15 | 15 | 12 | 12 | 0.211738381953    | 11 | 11 | 11 | 9  | 0.212558811456  | 11 | 10 | 10 | 8 | -0.023339748160 |
| 14 | 14 | 12 | 12 | 0.077750357364    | 15 | 15 | 10 | 9  | 0.009411249916  | 10 | 10 | 10 | 8 | -0.099796129706 |
| 14 | 13 | 12 | 12 | -0.060806198760   | 14 | 14 | 10 | 9  | 0.017604506000  | 15 | 15 | 9  | 8 | 0.013598928056  |
| 13 | 13 | 12 | 12 | 15.500042137863   | 14 | 13 | 10 | 9  | 0.063762274676  | 14 | 14 | 9  | 8 | 0.007838908831  |
| 14 | 12 | 12 | 12 | -0.106476277037   | 13 | 13 | 10 | 9  | -0.707036755784 | 14 | 13 | 9  | 8 | 0.137770111437  |
| 13 | 12 | 12 | 12 | -7.184340547219   | 14 | 12 | 10 | 9  | 0.015586333810  | 13 | 13 | 9  | 8 | -1.229898196310 |
| 12 | 12 | 12 | 12 | 5.829524084501    | 13 | 12 | 10 | 9  | -0.014823366427 | 14 | 12 | 9  | 8 | 0.007629673894  |
| 15 | 15 | 11 | 11 | -0.079081090985   | 12 | 12 | 10 | 9  | -0.176495876575 | 13 | 12 | 9  | 8 | -0.327422005348 |
| 14 | 14 | 11 | 11 | 0.016156965860    | 11 | 11 | 10 | 9  | -0.141072802437 | 12 | 12 | 9  | 8 | 0.023209132305  |
| 14 | 13 | 11 | 11 | -0.050832391020   | 11 | 10 | 10 | 9  | 0.061941262619  | 11 | 11 | 9  | 8 | 0.016068860046  |
| 13 | 13 | 11 | 11 | -2.877961505828   | 10 | 10 | 10 | 9  | -0.027129096745 | 11 | 10 | 9  | 8 | 0.160441142426  |
| 14 | 12 | 11 | 11 | -0.000540245051   | 15 | 15 | 9  | 9  | -0.094669660781 | 10 | 10 | 9  | 8 | -0.020486500615 |
| 13 | 12 | 11 | 11 | 1.279927933474    | 14 | 14 | 9  | 9  | 0.025693063470  | 11 | 9  | 9  | 8 | 0.053527120242  |
| 12 | 12 | 11 | 11 | 8.208606597115    | 14 | 13 | 9  | 9  | -2.681484497221 | 10 | 9  | 9  | 8 | -0.192365035472 |
| 11 | 11 | 11 | 11 | 0.218118511126    | 13 | 13 | 9  | 9  | 24.158045234738 | 9  | 9  | 9  | 8 | -0.004711061399 |
| 15 | 15 | 11 | 10 | 0.001600861953    | 14 | 12 | 9  | 9  | -0.193858345891 | 15 | 15 | 8  | 8 | 0.018132038023  |
| 14 | 14 | 11 | 10 | -0.003521164553   | 13 | 12 | 9  | 9  | 5.236974074268  | 14 | 14 | 8  | 8 | -0.041224211000 |
| 14 | 13 | 11 | 10 | 0.106379453132    | 12 | 12 | 9  | 9  | -3.379087339774 | 14 | 13 | 8  | 8 | 0.168941851792  |
| 13 | 13 | 11 | 10 | -0.193333666301   | 11 | 11 | 9  | 9  | -0.043551806473 | 13 | 13 | 8  | 8 | -1.261863948968 |

Table S5: CCSD(T)-F12b/cc-pVTZ-F12 force constants for c-(CH)C<sub>3</sub>H<sub>2</sub><sup>+</sup>(cont.)

|    |    |    |   |                 |    |    |   |   |                  |    |    |    |   |                 |
|----|----|----|---|-----------------|----|----|---|---|------------------|----|----|----|---|-----------------|
| 14 | 12 | 8  | 8 | 0.007188515512  | 10 | 10 | 9 | 7 | 0.235712591457   | 9  | 7  | 7  | 7 | -1.357708272942 |
| 13 | 12 | 8  | 8 | 0.017484438287  | 11 | 9  | 9 | 7 | -1.126896225631  | 8  | 7  | 7  | 7 | -0.851288964551 |
| 12 | 12 | 8  | 8 | 0.143554090785  | 10 | 9  | 9 | 7 | 0.234629792103   | 7  | 7  | 7  | 7 | 91.750629085818 |
| 11 | 11 | 8  | 8 | 0.046732466508  | 9  | 9  | 9 | 7 | 2.282973935400   | 15 | 14 | 11 | 6 | -0.005313522889 |
| 11 | 10 | 8  | 8 | -0.003515680229 | 15 | 15 | 8 | 7 | 0.001558725415   | 15 | 13 | 11 | 6 | 0.008719627305  |
| 10 | 10 | 8  | 8 | 0.023823474096  | 14 | 14 | 8 | 7 | 0.006381598102   | 15 | 12 | 11 | 6 | -0.019728156773 |
| 11 | 9  | 8  | 8 | 0.043361749253  | 14 | 13 | 8 | 7 | 0.037167411390   | 15 | 14 | 10 | 6 | -0.073844343748 |
| 10 | 9  | 8  | 8 | 0.028222115389  | 13 | 13 | 8 | 7 | 2.282496819849   | 15 | 13 | 10 | 6 | 0.248836364233  |
| 9  | 9  | 8  | 8 | 0.006168648337  | 14 | 12 | 8 | 7 | -0.020055142802  | 15 | 12 | 10 | 6 | 0.030845681592  |
| 11 | 8  | 8  | 8 | 0.060088550351  | 13 | 12 | 8 | 7 | 0.002179906815   | 15 | 14 | 9  | 6 | 0.026758356292  |
| 10 | 8  | 8  | 8 | -0.078234869463 | 12 | 12 | 8 | 7 | 0.043587181908   | 15 | 13 | 9  | 6 | -0.292434500770 |
| 9  | 8  | 8  | 8 | -0.017077078291 | 11 | 11 | 8 | 7 | 0.017359038699   | 15 | 12 | 9  | 6 | -0.030736686255 |
| 8  | 8  | 8  | 8 | 86.043974817369 | 11 | 10 | 8 | 7 | -0.008719627315  | 15 | 14 | 8  | 6 | 0.004468808994  |
| 15 | 15 | 11 | 7 | 0.026195860339  | 10 | 10 | 8 | 7 | -0.046025944427  | 15 | 13 | 8  | 6 | -0.013842408359 |
| 14 | 14 | 11 | 7 | 0.049585668760  | 11 | 9  | 8 | 7 | -0.164800956075  | 15 | 12 | 8  | 6 | 0.019183180083  |
| 14 | 13 | 11 | 7 | -0.095043937635 | 10 | 9  | 8 | 7 | -0.109431322682  | 15 | 14 | 7  | 6 | -0.030355202554 |
| 13 | 13 | 11 | 7 | -2.344338743549 | 9  | 9  | 8 | 7 | -0.019867062518  | 15 | 13 | 7  | 6 | 0.175155513500  |
| 14 | 12 | 11 | 7 | -0.089812161251 | 11 | 8  | 8 | 7 | -0.005619228151  | 15 | 12 | 7  | 6 | -0.077277696999 |
| 13 | 12 | 11 | 7 | 0.980086109203  | 10 | 8  | 8 | 7 | -0.149637475844  | 15 | 15 | 6  | 6 | -0.178012819978 |
| 12 | 12 | 11 | 7 | -0.168501076462 | 9  | 8  | 8 | 7 | 0.054008973342   | 14 | 14 | 6  | 6 | -0.045014190973 |
| 11 | 11 | 11 | 7 | -0.421378088687 | 8  | 8  | 8 | 7 | -0.599608812784  | 14 | 13 | 6  | 6 | 0.173930624664  |
| 15 | 15 | 10 | 7 | -0.091100143622 | 15 | 15 | 7 | 7 | -0.662783867880  | 13 | 13 | 6  | 6 | 1.395474232003  |
| 14 | 14 | 10 | 7 | -0.163026378126 | 14 | 14 | 7 | 7 | -0.269798765059  | 14 | 12 | 6  | 6 | -0.010033532367 |
| 14 | 13 | 10 | 7 | 0.543777757868  | 14 | 13 | 7 | 7 | 0.872298697994   | 13 | 12 | 6  | 6 | 0.037063515412  |
| 13 | 13 | 10 | 7 | -8.667884834461 | 13 | 13 | 7 | 7 | -73.173687604691 | 12 | 12 | 6  | 6 | 0.114722543343  |
| 14 | 12 | 10 | 7 | 0.001525934779  | 14 | 12 | 7 | 7 | 0.027481466336   | 11 | 11 | 6  | 6 | -0.025960138095 |
| 13 | 12 | 10 | 7 | 0.260280875081  | 13 | 12 | 7 | 7 | -0.972272530277  | 11 | 10 | 6  | 6 | -0.081057368962 |
| 12 | 12 | 10 | 7 | -0.136117054503 | 12 | 12 | 7 | 7 | 0.606951246448   | 10 | 10 | 6  | 6 | 0.086779723527  |
| 11 | 11 | 10 | 7 | 0.124427117788  | 11 | 11 | 7 | 7 | -1.422316738135  | 11 | 9  | 6  | 6 | 0.258571683591  |
| 11 | 10 | 10 | 7 | -0.168810406866 | 11 | 10 | 7 | 7 | 0.223127555670   | 10 | 9  | 6  | 6 | -0.089986272492 |
| 10 | 10 | 10 | 7 | 0.351565124561  | 10 | 10 | 7 | 7 | 0.361994435757   | 9  | 9  | 6  | 6 | -0.062621628394 |
| 15 | 15 | 9  | 7 | -0.006289659946 | 11 | 9  | 7 | 7 | 1.988442304887   | 11 | 8  | 6  | 6 | 0.030096853445  |
| 14 | 14 | 9  | 7 | 0.016336554120  | 10 | 9  | 7 | 7 | -0.157237649995  | 10 | 8  | 6  | 6 | -0.132281293124 |
| 14 | 13 | 9  | 7 | 0.398595963226  | 9  | 9  | 7 | 7 | -1.430357026598  | 9  | 8  | 6  | 6 | 0.028412242063  |
| 13 | 13 | 9  | 7 | -0.662895628521 | 11 | 8  | 7 | 7 | -0.076059956333  | 8  | 8  | 6  | 6 | 0.011269555461  |
| 14 | 12 | 9  | 7 | 0.024087970432  | 10 | 8  | 7 | 7 | 0.640694742537   | 11 | 7  | 6  | 6 | -0.015099756624 |
| 13 | 12 | 9  | 7 | -1.018016487986 | 9  | 8  | 7 | 7 | 0.138210716390   | 10 | 7  | 6  | 6 | 0.176912687838  |
| 12 | 12 | 9  | 7 | 0.636522609499  | 8  | 8  | 7 | 7 | 0.078863118690   | 9  | 7  | 6  | 6 | 0.247004601890  |
| 11 | 11 | 9  | 7 | 0.554649728931  | 11 | 7  | 7 | 7 | 0.008023921494   | 8  | 7  | 6  | 6 | 0.142683770934  |
| 11 | 10 | 9  | 7 | -0.180932266596 | 10 | 7  | 7 | 7 | 1.229076708901   | 7  | 7  | 6  | 6 | 0.397636710598  |

Table S6: CCSD(T)-F12b/cc-pVTZ-F12 force constants for c-(CH)C<sub>3</sub>H<sub>2</sub><sup>+</sup>(cont.)

|    |    |    |   |                 |    |    |    |   |                   |    |    |   |   |                 |
|----|----|----|---|-----------------|----|----|----|---|-------------------|----|----|---|---|-----------------|
| 6  | 6  | 6  | 6 | 0.087976126408  | 14 | 14 | 5  | 5 | 1.210375420442    | 14 | 14 | 6 | 4 | 0.031340984883  |
| 15 | 14 | 11 | 5 | -0.002370648675 | 14 | 13 | 5  | 5 | -14.761971302285  | 14 | 13 | 6 | 4 | -0.128723498685 |
| 15 | 13 | 11 | 5 | 0.844604899928  | 13 | 13 | 5  | 5 | 2259.248775498512 | 13 | 13 | 6 | 4 | -1.012755967197 |
| 15 | 12 | 11 | 5 | -0.647214336787 | 14 | 12 | 5  | 5 | 0.012027124681    | 14 | 12 | 6 | 4 | -0.000544976705 |
| 15 | 14 | 10 | 5 | -0.528736400765 | 13 | 12 | 5  | 5 | -1.338056587074   | 13 | 12 | 6 | 4 | -0.205783204916 |
| 15 | 13 | 10 | 5 | 2.005623275724  | 12 | 12 | 5  | 5 | 1.676416323284    | 12 | 12 | 6 | 4 | 0.010153206271  |
| 15 | 12 | 10 | 5 | 0.045669048006  | 11 | 11 | 5  | 5 | -1.129765882111   | 11 | 11 | 6 | 4 | 0.047162916877  |
| 15 | 14 | 9  | 5 | 0.075370278526  | 11 | 10 | 5  | 5 | -0.276028235342   | 11 | 10 | 6 | 4 | -0.040110285675 |
| 15 | 13 | 9  | 5 | -8.679517020390 | 10 | 10 | 5  | 5 | 0.671664683681    | 10 | 10 | 6 | 4 | -0.069363012403 |
| 15 | 12 | 9  | 5 | 0.802096716817  | 11 | 9  | 5  | 5 | 2.286687249751    | 11 | 9  | 6 | 4 | 0.029210750134  |
| 15 | 14 | 8  | 5 | -0.368703990868 | 10 | 9  | 5  | 5 | 0.014998040089    | 10 | 9  | 6 | 4 | -0.324370135825 |
| 15 | 13 | 8  | 5 | 1.487241432395  | 9  | 9  | 5  | 5 | -1.904610727755   | 9  | 9  | 6 | 4 | 0.028851699172  |
| 15 | 12 | 8  | 5 | -0.022671030994 | 11 | 8  | 5  | 5 | 0.082205346322    | 11 | 8  | 6 | 4 | 0.088504217121  |
| 15 | 14 | 7  | 5 | -0.278755585436 | 10 | 8  | 5  | 5 | -1.858348957371   | 10 | 8  | 6 | 4 | -0.139950018333 |
| 15 | 13 | 7  | 5 | 1.512419356226  | 9  | 8  | 5  | 5 | 0.053245740599    | 9  | 8  | 6 | 4 | 0.105507490401  |
| 15 | 12 | 7  | 5 | -0.142238920426 | 8  | 8  | 5  | 5 | -2.649557544481   | 8  | 8  | 6 | 4 | 0.119377289422  |
| 15 | 15 | 6  | 5 | -1.155642150762 | 11 | 7  | 5  | 5 | 0.480523858909    | 11 | 7  | 6 | 4 | -0.049701875505 |
| 14 | 14 | 6  | 5 | -0.653658231960 | 10 | 7  | 5  | 5 | -8.502464820284   | 10 | 7  | 6 | 4 | 0.136462167542  |
| 14 | 13 | 6  | 5 | 2.467436523718  | 9  | 7  | 5  | 5 | 0.820128263568    | 9  | 7  | 6 | 4 | -0.204039278770 |
| 13 | 13 | 6  | 5 | 3.387848922518  | 8  | 7  | 5  | 5 | 5.493674898335    | 8  | 7  | 6 | 4 | 0.017875236107  |
| 14 | 12 | 6  | 5 | 0.041091243714  | 7  | 7  | 5  | 5 | -434.781368199085 | 7  | 7  | 6 | 4 | 0.259921832234  |
| 13 | 12 | 6  | 5 | -0.347477158622 | 6  | 6  | 5  | 5 | 0.624610301105    | 6  | 6  | 6 | 4 | -0.078098751254 |
| 12 | 12 | 6  | 5 | 0.399826074436  | 6  | 5  | 5  | 5 | 3.618765446857    | 15 | 15 | 5 | 4 | -0.374720441391 |
| 11 | 11 | 6  | 5 | 0.209303735205  | 5  | 5  | 5  | 5 | 5710.329988726040 | 14 | 14 | 5 | 4 | -0.389726645849 |
| 11 | 10 | 6  | 5 | 0.099403750942  | 15 | 14 | 11 | 4 | 0.003406104417    | 14 | 13 | 5 | 4 | 1.595146820172  |
| 10 | 10 | 6  | 5 | 0.302286667103  | 15 | 13 | 11 | 4 | -0.016240305859   | 13 | 13 | 5 | 4 | -6.758997736410 |
| 11 | 9  | 6  | 5 | -0.089376184211 | 15 | 12 | 11 | 4 | -0.001852920803   | 14 | 12 | 5 | 4 | 0.005776753075  |
| 10 | 9  | 6  | 5 | 0.032262620855  | 15 | 14 | 10 | 4 | 0.029047258464    | 13 | 12 | 5 | 4 | 0.146053757193  |
| 9  | 9  | 6  | 5 | 0.491264335435  | 15 | 13 | 10 | 4 | -0.066051176844   | 12 | 12 | 5 | 4 | 0.095598172074  |
| 11 | 8  | 6  | 5 | 0.044034117640  | 15 | 12 | 10 | 4 | -0.009264604013   | 11 | 11 | 5 | 4 | -0.029374967078 |
| 10 | 8  | 6  | 5 | -0.583343067106 | 15 | 14 | 9  | 4 | 0.014196643208    | 11 | 10 | 5 | 4 | -0.020055142743 |
| 9  | 8  | 6  | 5 | 0.063217297851  | 15 | 13 | 9  | 4 | 0.264858679418    | 10 | 10 | 5 | 4 | -0.584339609041 |
| 8  | 8  | 6  | 5 | -0.078761681956 | 15 | 12 | 9  | 4 | -0.034442527861   | 11 | 9  | 5 | 4 | -0.038366360268 |
| 11 | 7  | 6  | 5 | 0.251125266762  | 15 | 14 | 8  | 4 | -0.018556456861   | 10 | 9  | 5 | 4 | 0.078476645815  |
| 10 | 7  | 6  | 5 | 0.419850055946  | 15 | 13 | 8  | 4 | 0.096678867760    | 9  | 9  | 5 | 4 | -0.092631898245 |
| 9  | 7  | 6  | 5 | 0.123382726150  | 15 | 12 | 8  | 4 | -0.024850937822   | 11 | 8  | 5 | 4 | 0.074988794846  |
| 8  | 7  | 6  | 5 | 1.155350618630  | 15 | 14 | 7  | 4 | -0.005994743773   | 10 | 8  | 5 | 4 | -0.102019639496 |
| 7  | 7  | 6  | 5 | -4.653236709836 | 15 | 13 | 7  | 4 | 0.023869979752    | 9  | 8  | 5 | 4 | -0.194883670267 |
| 6  | 6  | 6  | 5 | 0.068909755821  | 15 | 12 | 7  | 4 | 0.048066945525    | 8  | 8  | 5 | 4 | 1.282849674627  |
| 15 | 15 | 5  | 5 | 1.238044000816  | 15 | 15 | 6  | 4 | 0.002483262498    | 11 | 7  | 5 | 4 | -0.066705148921 |

Table S7: CCSD(T)-F12b/cc-pVTZ-F12 force constants for c-(CH)C<sub>3</sub>H<sub>2</sub><sup>+</sup>(cont.)

|    |    |    |   |                 |    |    |    |   |                   |    |    |   |   |                   |
|----|----|----|---|-----------------|----|----|----|---|-------------------|----|----|---|---|-------------------|
| 10 | 7  | 5  | 4 | 1.253882406583  | 15 | 12 | 10 | 3 | -0.035859467306   | 11 | 11 | 5 | 3 | 0.050900057816    |
| 9  | 7  | 5  | 4 | 0.330473874895  | 15 | 14 | 9  | 3 | 0.008419890117    | 11 | 10 | 5 | 3 | 0.088504216252    |
| 8  | 7  | 5  | 4 | 0.845803848685  | 15 | 13 | 9  | 3 | 1.622613646318    | 10 | 10 | 5 | 3 | 0.492906033482    |
| 7  | 7  | 5  | 4 | -3.368516612566 | 15 | 12 | 9  | 3 | 0.096460877075    | 11 | 9  | 5 | 3 | -0.018311247793   |
| 6  | 6  | 5  | 4 | -0.357776596071 | 15 | 14 | 8  | 3 | 0.114390610719    | 10 | 9  | 5 | 3 | -0.097659824513   |
| 6  | 5  | 5  | 4 | -1.138398081960 | 15 | 13 | 8  | 3 | -0.366224346841   | 9  | 9  | 5 | 3 | 0.660164079684    |
| 5  | 5  | 5  | 4 | 1.013812219782  | 15 | 12 | 8  | 3 | 0.070955967192    | 11 | 8  | 5 | 3 | 0.064089260759    |
| 15 | 15 | 4  | 4 | -0.002378524251 | 15 | 14 | 7  | 3 | 0.198480516551    | 10 | 8  | 5 | 3 | 0.388459395567    |
| 14 | 14 | 4  | 4 | -0.041304401602 | 15 | 13 | 7  | 3 | -0.663127656620   | 9  | 8  | 5 | 3 | -0.014823366371   |
| 14 | 13 | 4  | 4 | 0.131378843598  | 15 | 12 | 7  | 3 | -0.019292175414   | 8  | 8  | 5 | 3 | 0.839947759822    |
| 13 | 13 | 4  | 4 | -1.130898573368 | 15 | 15 | 6  | 3 | 0.366235043080    | 11 | 7  | 5 | 3 | -0.421593977145   |
| 14 | 12 | 4  | 4 | 0.000935758763  | 14 | 14 | 6  | 3 | 0.107763208610    | 10 | 7  | 5 | 3 | 1.038071637007    |
| 13 | 12 | 4  | 4 | 0.039714281868  | 14 | 13 | 6  | 3 | -0.370257165087   | 9  | 7  | 5 | 3 | -0.269000495055   |
| 12 | 12 | 4  | 4 | 0.099068260465  | 13 | 13 | 6  | 3 | -0.712827890957   | 8  | 7  | 5 | 3 | -1.362441765077   |
| 11 | 11 | 4  | 4 | -0.006049469716 | 14 | 12 | 6  | 3 | 0.003378855508    | 7  | 7  | 5 | 3 | 112.077105277779  |
| 11 | 10 | 4  | 4 | 0.051271695084  | 13 | 12 | 6  | 3 | 0.124254691218    | 6  | 6  | 5 | 3 | 0.167396566504    |
| 10 | 10 | 4  | 4 | 0.025253258209  | 12 | 12 | 6  | 3 | -0.051686430044   | 6  | 5  | 5 | 3 | -1.202493471059   |
| 11 | 9  | 4  | 4 | 0.092410473411  | 11 | 11 | 6  | 3 | -0.178863424576   | 5  | 5  | 5 | 3 | -845.600942286610 |
| 10 | 9  | 4  | 4 | 0.177462136086  | 11 | 10 | 6  | 3 | 0.028774770842    | 15 | 15 | 4 | 3 | 0.072786552609    |
| 9  | 9  | 4  | 4 | -0.082095224411 | 10 | 10 | 6  | 3 | -0.078587994590   | 14 | 14 | 4 | 3 | 0.067636142951    |
| 11 | 8  | 4  | 4 | 0.062185081992  | 11 | 9  | 6  | 3 | 0.020491161348    | 14 | 13 | 4 | 3 | -0.121093823647   |
| 10 | 8  | 4  | 4 | -0.011462137025 | 10 | 9  | 6  | 3 | -0.135154224243   | 13 | 13 | 4 | 3 | 1.934473420597    |
| 9  | 8  | 4  | 4 | -0.041554047472 | 9  | 9  | 6  | 3 | -0.078508638272   | 14 | 12 | 4 | 3 | 0.015477338454    |
| 8  | 8  | 4  | 4 | 85.774992995489 | 11 | 8  | 6  | 3 | -0.280336017478   | 13 | 12 | 4 | 3 | -0.071936924786   |
| 11 | 7  | 4  | 4 | -0.114782536187 | 10 | 8  | 6  | 3 | 0.063217299040    | 12 | 12 | 4 | 3 | 0.129994985859    |
| 10 | 7  | 4  | 4 | -0.141876887639 | 9  | 8  | 6  | 3 | -0.155209365631   | 11 | 11 | 4 | 3 | -0.077348038412   |
| 9  | 7  | 4  | 4 | -0.052462279740 | 8  | 8  | 6  | 3 | -0.163881614324   | 11 | 10 | 4 | 3 | 0.015259347899    |
| 8  | 7  | 4  | 4 | -0.471945319132 | 11 | 7  | 6  | 3 | -0.160441143009   | 10 | 10 | 4 | 3 | 0.317175456292    |
| 7  | 7  | 4  | 4 | -0.153318435260 | 10 | 7  | 6  | 3 | 0.651356154026    | 11 | 9  | 4 | 3 | -0.090248141106   |
| 6  | 6  | 4  | 4 | -0.023493563114 | 9  | 7  | 6  | 3 | 0.101583648602    | 10 | 9  | 4 | 3 | -0.238917788231   |
| 6  | 5  | 4  | 4 | -0.159847792659 | 8  | 7  | 6  | 3 | 0.091120102756    | 9  | 9  | 4 | 3 | -0.126177952122   |
| 5  | 5  | 4  | 4 | -2.631494448249 | 7  | 7  | 6  | 3 | -1.475075960520   | 11 | 8  | 4 | 3 | -0.189215912533   |
| 6  | 4  | 4  | 4 | 0.024723140928  | 6  | 6  | 6  | 3 | 0.102723245953    | 10 | 8  | 4 | 3 | -0.094171974851   |
| 5  | 4  | 4  | 4 | 1.277214657396  | 15 | 15 | 5  | 3 | 0.636009375994    | 9  | 8  | 4 | 3 | 0.096351881771    |
| 4  | 4  | 4  | 4 | 85.970318264839 | 14 | 14 | 5  | 3 | 0.218768191751    | 8  | 8  | 4 | 3 | -0.605757444755   |
| 15 | 14 | 11 | 3 | 0.009646087706  | 14 | 13 | 5  | 3 | 0.019946142763    | 11 | 7  | 4 | 3 | 0.010463552629    |
| 15 | 13 | 11 | 3 | 0.097223844472  | 13 | 13 | 5  | 3 | -435.619849414027 | 10 | 7  | 4 | 3 | -0.095915900630   |
| 15 | 12 | 11 | 3 | -0.051009819736 | 14 | 12 | 5  | 3 | 0.004032827710    | 9  | 7  | 4 | 3 | -0.108995341651   |
| 15 | 14 | 10 | 3 | 0.164146984033  | 13 | 12 | 5  | 3 | 2.968161133321    | 8  | 7  | 4 | 3 | -0.439033234967   |
| 15 | 13 | 10 | 3 | -0.531243293612 | 12 | 12 | 5  | 3 | -2.695197935841   | 7  | 7  | 4 | 3 | 1.156479222070    |

Table S8: CCSD(T)-F12b/cc-pVTZ-F12 force constants for c-(CH)C<sub>3</sub>H<sub>2</sub><sup>+</sup>(cont.)

|    |    |    |   |                  |    |    |    |   |                 |    |    |   |   |                  |
|----|----|----|---|------------------|----|----|----|---|-----------------|----|----|---|---|------------------|
| 6  | 6  | 4  | 3 | 0.058688063919   | 15 | 12 | 11 | 2 | 0.663781628667  | 14 | 12 | 5 | 2 | -0.011444510843  |
| 6  | 5  | 4  | 3 | 0.193573968102   | 15 | 14 | 10 | 2 | -0.000926460401 | 13 | 12 | 5 | 2 | -4.842009042578  |
| 5  | 5  | 4  | 3 | -0.231161619804  | 15 | 13 | 10 | 2 | 0.081746505996  | 12 | 12 | 5 | 2 | 4.814392119537   |
| 6  | 4  | 4  | 3 | -0.248096761227  | 15 | 12 | 10 | 2 | -0.129704456177 | 11 | 11 | 5 | 2 | -2.402568048331  |
| 5  | 4  | 4  | 3 | 1.067032743148   | 15 | 14 | 9  | 2 | 0.050056110504  | 11 | 10 | 5 | 2 | 0.057113558877   |
| 4  | 4  | 4  | 3 | -0.593007955268  | 15 | 13 | 9  | 2 | 0.661274735823  | 10 | 10 | 5 | 2 | -0.123416015027  |
| 15 | 15 | 3  | 3 | -0.144649954152  | 15 | 12 | 9  | 2 | -0.794358047574 | 11 | 9  | 5 | 2 | 3.317818191415   |
| 14 | 14 | 3  | 3 | -0.095337496627  | 15 | 14 | 8  | 2 | -0.016540043046 | 10 | 9  | 5 | 2 | -0.032262621116  |
| 14 | 13 | 3  | 3 | 0.383498141167   | 15 | 13 | 8  | 2 | 0.046541010745  | 9  | 9  | 5 | 2 | -5.985542236411  |
| 13 | 13 | 3  | 3 | 97.730303797703  | 15 | 12 | 8  | 2 | -0.013515422322 | 11 | 8  | 5 | 2 | -0.012207478172  |
| 14 | 12 | 3  | 3 | 0.005539722037   | 15 | 14 | 7  | 2 | -0.076296738927 | 10 | 8  | 5 | 2 | -0.068885055688  |
| 13 | 12 | 3  | 3 | 1.164057901090   | 15 | 13 | 7  | 2 | 0.240334727622  | 9  | 8  | 5 | 2 | 0.191831800714   |
| 12 | 12 | 3  | 3 | -0.998983937806  | 15 | 12 | 7  | 2 | -0.042508183120 | 8  | 8  | 5 | 2 | -0.045573597898  |
| 11 | 11 | 3  | 3 | -0.061962253074  | 15 | 15 | 6  | 2 | -0.008531833027 | 11 | 7  | 5 | 2 | -0.943463674748  |
| 11 | 10 | 3  | 3 | -0.033064540621  | 14 | 14 | 6  | 2 | 0.037613592030  | 10 | 7  | 5 | 2 | 1.268705772703   |
| 10 | 10 | 3  | 3 | 0.170667635247   | 14 | 13 | 6  | 2 | -0.054061690707 | 9  | 7  | 5 | 2 | 3.503110269836   |
| 11 | 9  | 3  | 3 | 0.125056743719   | 13 | 13 | 6  | 2 | 0.969785749068  | 8  | 7  | 5 | 2 | 0.323934154346   |
| 10 | 9  | 3  | 3 | -0.005301251830  | 14 | 12 | 6  | 2 | -0.050900824420 | 7  | 7  | 5 | 2 | -5.147110436450  |
| 9  | 9  | 3  | 3 | 0.353356810716   | 13 | 12 | 6  | 2 | 0.598602413423  | 6  | 6  | 5 | 2 | -0.216380833512  |
| 11 | 8  | 3  | 3 | -0.031917135888  | 12 | 12 | 6  | 2 | -0.542294549144 | 6  | 5  | 5 | 2 | 1.639509365994   |
| 10 | 8  | 3  | 3 | -0.135001816995  | 11 | 11 | 6  | 2 | 0.436287135622  | 5  | 5  | 5 | 2 | -26.070723250539 |
| 9  | 8  | 3  | 3 | 0.037550411410   | 11 | 10 | 6  | 2 | -0.020055142747 | 15 | 15 | 4 | 2 | -0.003591693358  |
| 8  | 8  | 3  | 3 | -0.348929187787  | 10 | 10 | 6  | 2 | 0.082745966828  | 14 | 14 | 4 | 2 | 0.002294763529   |
| 11 | 7  | 3  | 3 | 0.153921500068   | 11 | 9  | 6  | 2 | -0.431185570758 | 14 | 13 | 4 | 2 | -0.003923832392  |
| 10 | 7  | 3  | 3 | -0.493103472973  | 10 | 9  | 6  | 2 | 0.153029459250  | 13 | 13 | 4 | 2 | -0.160250476793  |
| 9  | 7  | 3  | 3 | -0.085527103506  | 9  | 9  | 6  | 2 | 0.943928135892  | 14 | 12 | 4 | 2 | 0.042835169139   |
| 8  | 7  | 3  | 3 | 0.830348459104   | 11 | 8  | 6  | 2 | 0.330037893423  | 13 | 12 | 4 | 2 | -0.157825254325  |
| 7  | 7  | 3  | 3 | 21.811321781558  | 10 | 8  | 6  | 2 | 0.059293465660  | 12 | 12 | 4 | 2 | -0.068694389411  |
| 6  | 6  | 3  | 3 | 0.297386008404   | 9  | 8  | 6  | 2 | -0.116407024628 | 11 | 11 | 4 | 2 | -0.123952659833  |
| 6  | 5  | 3  | 3 | 0.495417175336   | 8  | 8  | 6  | 2 | 0.022342742203  | 11 | 10 | 4 | 2 | -0.068885055704  |
| 5  | 5  | 3  | 3 | 182.639968379827 | 11 | 7  | 6  | 2 | 0.245021527168  | 10 | 10 | 4 | 2 | -0.027164796010  |
| 6  | 4  | 3  | 3 | 0.035205762305   | 10 | 7  | 6  | 2 | -0.607322041953 | 11 | 9  | 4 | 2 | -0.027030844801  |
| 5  | 4  | 3  | 3 | 0.207256000915   | 9  | 7  | 6  | 2 | -0.662255693767 | 10 | 9  | 4 | 2 | -0.199243483959  |
| 4  | 4  | 3  | 3 | -0.378572849333  | 8  | 7  | 6  | 2 | 0.131666372421  | 9  | 9  | 4 | 2 | -0.064183577851  |
| 6  | 3  | 3  | 3 | -0.422428852320  | 7  | 7  | 6  | 2 | 1.867257378994  | 11 | 8  | 4 | 2 | 0.034006546495   |
| 5  | 3  | 3  | 3 | -59.684061774096 | 6  | 6  | 6  | 2 | 0.296944742163  | 10 | 8  | 4 | 2 | 0.133846279147   |
| 4  | 3  | 3  | 3 | 0.227403931247   | 15 | 15 | 5  | 2 | -0.361256964363 | 9  | 8  | 4 | 2 | 0.285567794268   |
| 3  | 3  | 3  | 3 | 77.933642948496  | 14 | 14 | 5  | 2 | -0.107942018669 | 8  | 8  | 4 | 2 | -0.053085871603  |
| 15 | 14 | 11 | 2 | -0.037412650909  | 14 | 13 | 5  | 2 | 0.533423200879  | 11 | 7  | 4 | 2 | -0.108559359933  |
| 15 | 13 | 11 | 2 | -0.673700204734  | 13 | 13 | 5  | 2 | 13.496912587288 | 10 | 7  | 4 | 2 | 0.103763564977   |



Table S9: CCSD(T)-F12b/cc-pVTZ-F12 force constants for c-(CH)C<sub>3</sub>H<sub>2</sub><sup>+</sup>(cont.)

|    |    |   |   |                 |    |    |    |   |                  |    |    |    |   |                 |
|----|----|---|---|-----------------|----|----|----|---|------------------|----|----|----|---|-----------------|
| 9  | 7  | 4 | 2 | -0.048393931515 | 3  | 3  | 3  | 2 | 0.349451697414   | 15 | 12 | 11 | 1 | -0.254504121994 |
| 8  | 7  | 4 | 2 | 0.044034117901  | 15 | 15 | 2  | 2 | 0.062104721792   | 15 | 14 | 10 | 1 | 0.002752132369  |
| 7  | 7  | 4 | 2 | -0.084793607285 | 14 | 14 | 2  | 2 | 0.018886953499   | 15 | 13 | 10 | 1 | 0.032153625692  |
| 6  | 6  | 4 | 2 | -0.054316294359 | 14 | 13 | 2  | 2 | -0.186782917875  | 15 | 12 | 10 | 1 | -0.003378855583 |
| 6  | 5  | 4 | 2 | -0.091119705920 | 13 | 13 | 2  | 2 | -9.497867748576  | 15 | 14 | 9  | 1 | -0.010381806261 |
| 5  | 5  | 4 | 2 | -0.684054271110 | 14 | 12 | 2  | 2 | 0.133386897549   | 15 | 13 | 9  | 1 | -0.250362299022 |
| 6  | 4  | 4 | 2 | -0.006985325307 | 13 | 12 | 2  | 2 | 11.244574883907  | 15 | 12 | 9  | 1 | 0.310745718117  |
| 5  | 4  | 4 | 2 | -0.118961004748 | 12 | 12 | 2  | 2 | -10.398443482874 | 15 | 14 | 8  | 1 | -0.017657245295 |
| 4  | 4  | 4 | 2 | -0.091258777089 | 11 | 11 | 2  | 2 | 0.570788140952   | 15 | 13 | 8  | 1 | -0.065397204797 |
| 15 | 15 | 3 | 2 | 0.046638897038  | 11 | 10 | 2  | 2 | 0.050783395938   | 15 | 12 | 8  | 1 | 0.064525242065  |
| 14 | 14 | 3 | 2 | 0.021884161939  | 10 | 10 | 2  | 2 | 0.070646641659   | 15 | 14 | 7  | 1 | -0.030273456053 |
| 14 | 13 | 3 | 2 | 0.054606673165  | 11 | 9  | 2  | 2 | -0.672754262004  | 15 | 13 | 7  | 1 | 0.071718934592  |
| 13 | 13 | 3 | 2 | -3.160956677921 | 10 | 9  | 2  | 2 | -0.209549802256  | 15 | 12 | 7  | 1 | -0.003923832290 |
| 14 | 12 | 3 | 2 | -0.076296739015 | 9  | 9  | 2  | 2 | 1.197898076757   | 15 | 15 | 6  | 1 | -0.001558874154 |
| 13 | 12 | 3 | 2 | -1.895646971197 | 11 | 8  | 2  | 2 | 0.039444293992   | 14 | 14 | 6  | 1 | 0.008581850564  |
| 12 | 12 | 3 | 2 | 1.901949520887  | 10 | 8  | 2  | 2 | -0.093356876692  | 14 | 13 | 6  | 1 | -0.010790538560 |
| 11 | 11 | 3 | 2 | -0.633866811736 | 9  | 8  | 2  | 2 | 0.091960885843   | 13 | 13 | 6  | 1 | 0.164824876072  |
| 11 | 10 | 3 | 2 | -0.156953291356 | 8  | 8  | 2  | 2 | 0.165246905187   | 14 | 12 | 6  | 1 | 0.025940891225  |
| 10 | 10 | 3 | 2 | 0.016617371016  | 11 | 7  | 2  | 2 | 0.210075898806   | 13 | 12 | 6  | 1 | -0.088940198455 |
| 11 | 9  | 3 | 2 | 0.793486095090  | 10 | 7  | 2  | 2 | -0.016314254353  | 12 | 12 | 6  | 1 | 0.069393405205  |
| 10 | 9  | 3 | 2 | 0.367096309308  | 9  | 7  | 2  | 2 | -0.915356597785  | 11 | 11 | 6  | 1 | -0.138263406481 |
| 9  | 9  | 3 | 2 | -0.990261830201 | 8  | 7  | 2  | 2 | -0.233515830103  | 11 | 10 | 6  | 1 | -0.075860757602 |
| 11 | 8  | 3 | 2 | -0.160877123680 | 7  | 7  | 2  | 2 | 2.874895009830   | 10 | 10 | 6  | 1 | 0.004262866905  |
| 10 | 8  | 3 | 2 | 0.103763565242  | 6  | 6  | 2  | 2 | 0.021568250684   | 11 | 9  | 6  | 1 | 0.121202819489  |
| 9  | 8  | 3 | 2 | -0.107251415706 | 6  | 5  | 2  | 2 | 0.905209305430   | 10 | 9  | 6  | 1 | -0.281643961981 |
| 8  | 8  | 3 | 2 | 0.142893447607  | 5  | 5  | 2  | 2 | -5.832425669674  | 9  | 9  | 6  | 1 | -0.276746937010 |
| 11 | 7  | 3 | 2 | 0.241097693996  | 6  | 4  | 2  | 2 | -0.158130904256  | 11 | 8  | 6  | 1 | -0.189215912634 |
| 10 | 7  | 3 | 2 | -0.183112175240 | 5  | 4  | 2  | 2 | -0.001955548780  | 10 | 8  | 6  | 1 | 0.064961223403  |
| 9  | 7  | 3 | 2 | 0.220606568615  | 4  | 4  | 2  | 2 | 0.092901103308   | 9  | 8  | 6  | 1 | -0.202731334829 |
| 8  | 7  | 3 | 2 | 0.013079440389  | 6  | 3  | 2  | 2 | 0.103715492281   | 8  | 8  | 6  | 1 | 0.063477052678  |
| 7  | 7  | 3 | 2 | 1.723999643088  | 5  | 3  | 2  | 2 | -2.346248750619  | 11 | 7  | 6  | 1 | 0.031390658240  |
| 6  | 6  | 3 | 2 | -0.022631086942 | 4  | 3  | 2  | 2 | -0.148958240738  | 10 | 7  | 6  | 1 | -0.204475260191 |
| 6  | 5  | 3 | 2 | -0.216736495505 | 3  | 3  | 2  | 2 | -0.836696347442  | 9  | 7  | 6  | 1 | 0.148233664200  |
| 5  | 5  | 3 | 2 | 3.491226573870  | 6  | 2  | 2  | 2 | -0.814008065805  | 8  | 7  | 6  | 1 | 0.065833186240  |
| 6  | 4  | 3 | 2 | -0.336144005416 | 5  | 2  | 2  | 2 | 3.270402052485   | 7  | 7  | 6  | 1 | 0.217973005933  |
| 5  | 4  | 3 | 2 | 0.229761527313  | 4  | 2  | 2  | 2 | 0.143892111640   | 6  | 6  | 6  | 1 | -0.032996029505 |
| 4  | 4  | 3 | 2 | 0.027099654873  | 3  | 2  | 2  | 2 | 0.052295712297   | 15 | 15 | 5  | 1 | -0.000209423843 |
| 6  | 3  | 3 | 2 | -0.298811547376 | 2  | 2  | 2  | 2 | 407.849807848417 | 14 | 14 | 5  | 1 | 0.009690815994  |
| 5  | 3  | 3 | 2 | 2.130653335143  | 15 | 14 | 11 | 1 | 0.014496380396   | 14 | 13 | 5  | 1 | 0.005776752915  |
| 4  | 3  | 3 | 2 | -0.293294077949 | 15 | 13 | 11 | 1 | 0.266929590902   | 13 | 13 | 5  | 1 | -1.664248736313 |

Table S10: CCSD(T)-F12b/cc-pVTZ-F12 force constants for c-(CH)C<sub>3</sub>H<sub>2</sub><sup>+</sup> (cont.)

|    |    |   |   |                 |    |    |   |   |                 |    |    |   |   |                 |
|----|----|---|---|-----------------|----|----|---|---|-----------------|----|----|---|---|-----------------|
| 14 | 12 | 5 | 1 | 0.025395914522  | 9  | 7  | 4 | 1 | -0.059729447045 | 3  | 3  | 3 | 1 | -0.072910940302 |
| 13 | 12 | 5 | 1 | 1.610079181952  | 8  | 7  | 4 | 1 | -0.037930378777 | 15 | 15 | 2 | 1 | -0.016219751072 |
| 12 | 12 | 5 | 1 | -1.812869944141 | 7  | 7  | 4 | 1 | 0.013300455434  | 14 | 14 | 2 | 1 | -0.006176245146 |
| 11 | 11 | 5 | 1 | 0.736152093816  | 6  | 6  | 4 | 1 | 0.071449520613  | 14 | 13 | 2 | 1 | 0.042399187746  |
| 11 | 10 | 5 | 1 | -0.048393931507 | 6  | 5  | 4 | 1 | 0.165672912345  | 13 | 13 | 2 | 1 | 5.038590716757  |
| 10 | 10 | 5 | 1 | 0.147735787898  | 5  | 5  | 4 | 1 | -0.027833993990 | 14 | 12 | 2 | 1 | 0.004250818307  |
| 11 | 9  | 5 | 1 | -1.065974438312 | 6  | 4  | 4 | 1 | -0.027001446150 | 13 | 12 | 2 | 1 | -5.053460005214 |
| 10 | 9  | 5 | 1 | 0.144745813260  | 5  | 4  | 4 | 1 | -0.017677955025 | 12 | 12 | 2 | 1 | 4.951781983404  |
| 9  | 9  | 5 | 1 | 1.459326273637  | 4  | 4  | 4 | 1 | -0.032775720197 | 11 | 11 | 2 | 1 | -0.216268692440 |
| 11 | 8  | 5 | 1 | -0.085016366163 | 15 | 15 | 3 | 1 | -0.001440038160 | 11 | 10 | 2 | 1 | 0.125998614567  |
| 10 | 8  | 5 | 1 | -0.032698602328 | 14 | 14 | 3 | 1 | 0.003999001544  | 10 | 10 | 2 | 1 | -0.008186676951 |
| 9  | 8  | 5 | 1 | 0.138642074190  | 14 | 13 | 3 | 1 | -0.011008529360 | 11 | 9  | 2 | 1 | 0.197499558442  |
| 8  | 8  | 5 | 1 | -0.110206650011 | 13 | 13 | 3 | 1 | -0.722720125627 | 10 | 9  | 2 | 1 | 0.089812161262  |
| 11 | 7  | 5 | 1 | 0.225838347339  | 14 | 12 | 3 | 1 | 0.010572548118  | 9  | 9  | 2 | 1 | -0.149603177587 |
| 10 | 7  | 5 | 1 | -0.146489738720 | 13 | 12 | 3 | 1 | 0.779098699868  | 11 | 8  | 2 | 1 | 0.266820595577  |
| 9  | 7  | 5 | 1 | -0.075424776128 | 12 | 12 | 3 | 1 | -0.913583077005 | 10 | 8  | 2 | 1 | -0.175264508868 |
| 8  | 7  | 5 | 1 | 0.068013093026  | 11 | 11 | 3 | 1 | 0.455769482293  | 9  | 8  | 2 | 1 | -0.173084601993 |
| 7  | 7  | 5 | 1 | -0.046077748966 | 11 | 10 | 3 | 1 | -0.141257962359 | 8  | 8  | 2 | 1 | -0.134066387824 |
| 6  | 6  | 5 | 1 | 0.000001934777  | 10 | 10 | 3 | 1 | -0.069231351626 | 11 | 7  | 2 | 1 | -0.228890216790 |
| 6  | 5  | 5 | 1 | 0.098860774643  | 11 | 9  | 3 | 1 | -0.780406643674 | 10 | 7  | 2 | 1 | -0.057113558819 |
| 5  | 5  | 5 | 1 | -0.259424296973 | 10 | 9  | 3 | 1 | -0.048393931548 | 9  | 7  | 2 | 1 | 0.319138359430  |
| 15 | 15 | 4 | 1 | -0.001672787354 | 9  | 9  | 3 | 1 | 0.604161681932  | 8  | 7  | 2 | 1 | -0.050137856983 |
| 14 | 14 | 4 | 1 | 0.007756819613  | 11 | 8  | 3 | 1 | 0.110739266824  | 7  | 7  | 2 | 1 | 0.075918091312  |
| 14 | 13 | 4 | 1 | 0.038148369468  | 10 | 8  | 3 | 1 | -0.087196273027 | 6  | 6  | 2 | 1 | -0.015567987982 |
| 13 | 13 | 4 | 1 | 0.030518447409  | 9  | 8  | 3 | 1 | -0.070628981239 | 6  | 5  | 2 | 1 | -0.117279175173 |
| 14 | 12 | 4 | 1 | -0.006103739112 | 8  | 8  | 3 | 1 | 0.105953885110  | 5  | 5  | 2 | 1 | 0.147097762886  |
| 13 | 12 | 4 | 1 | -0.051445801098 | 11 | 7  | 3 | 1 | 0.009591590050  | 6  | 4  | 2 | 1 | -0.045778018682 |
| 12 | 12 | 4 | 1 | 0.042338386651  | 10 | 7  | 3 | 1 | 0.003487850848  | 5  | 4  | 2 | 1 | -0.094607955306 |
| 11 | 11 | 4 | 1 | 0.002202747980  | 9  | 7  | 3 | 1 | -0.180060303824 | 4  | 4  | 2 | 1 | -0.088031356856 |
| 11 | 10 | 4 | 1 | 0.039674304248  | 8  | 7  | 3 | 1 | 0.197499558400  | 6  | 3  | 2 | 1 | -0.069322201394 |
| 10 | 10 | 4 | 1 | 0.116826212419  | 7  | 7  | 3 | 1 | 0.030093130796  | 5  | 3  | 2 | 1 | 0.106378787206  |
| 11 | 9  | 4 | 1 | 0.043162155170  | 6  | 6  | 3 | 1 | 0.104863451630  | 4  | 3  | 2 | 1 | 0.068013070142  |
| 10 | 9  | 4 | 1 | -0.088068235800 | 6  | 5  | 3 | 1 | 0.382352498525  | 3  | 3  | 2 | 1 | -0.048221612677 |
| 9  | 9  | 4 | 1 | 0.191973545942  | 5  | 5  | 3 | 1 | -0.120281793705 | 6  | 2  | 2 | 1 | 0.094291433091  |
| 11 | 8  | 4 | 1 | 0.105071509042  | 6  | 4  | 3 | 1 | 0.091991891538  | 5  | 2  | 2 | 1 | -0.205119834060 |
| 10 | 8  | 4 | 1 | -0.193139744832 | 5  | 4  | 3 | 1 | -0.002615919974 | 4  | 2  | 2 | 1 | -0.019114358182 |
| 9  | 8  | 4 | 1 | -0.268128539659 | 4  | 4  | 3 | 1 | -0.071934544479 | 3  | 2  | 2 | 1 | -0.012460518178 |
| 8  | 8  | 4 | 1 | 0.157491383361  | 6  | 3  | 3 | 1 | -0.069877602360 | 2  | 2  | 2 | 1 | -0.400536928781 |
| 11 | 7  | 4 | 1 | 0.231070123591  | 5  | 3  | 3 | 1 | -0.180282823220 | 15 | 15 | 1 | 1 | 0.002522991032  |
| 10 | 7  | 4 | 1 | 0.052753745210  | 4  | 3  | 3 | 1 | -0.004260903943 | 14 | 14 | 1 | 1 | 0.005977190154  |

Table S11: CCSD(T)-F12b/cc-pVTZ-F12 force constants for c-(CH)C<sub>3</sub>H<sub>2</sub><sup>+</sup> (cont.)

|    |    |   |   |                 |    |   |   |   |                 |   |   |   |   |                  |
|----|----|---|---|-----------------|----|---|---|---|-----------------|---|---|---|---|------------------|
| 14 | 13 | 1 | 1 | -0.033753458333 | 8  | 8 | 1 | 1 | 0.113806119776  | 4 | 3 | 1 | 1 | 0.086050622125   |
| 13 | 13 | 1 | 1 | 2.859705581539  | 11 | 7 | 1 | 1 | 0.013291349696  | 3 | 3 | 1 | 1 | 0.025482258276   |
| 14 | 12 | 1 | 1 | -0.005115662588 | 10 | 7 | 1 | 1 | -0.069887644656 | 6 | 2 | 1 | 1 | -0.020456799342  |
| 13 | 12 | 1 | 1 | -2.603518661104 | 9  | 7 | 1 | 1 | 0.118512172536  | 5 | 2 | 1 | 1 | 0.017004714225   |
| 12 | 12 | 1 | 1 | 2.883766444474  | 8  | 7 | 1 | 1 | -0.033661972235 | 4 | 2 | 1 | 1 | 0.087422495964   |
| 11 | 11 | 1 | 1 | 2.875235487984  | 7  | 7 | 1 | 1 | -0.073870049510 | 3 | 2 | 1 | 1 | 0.017539601960   |
| 11 | 10 | 1 | 1 | 0.023229373655  | 6  | 6 | 1 | 1 | 0.042094986234  | 2 | 2 | 1 | 1 | -0.866628524264  |
| 10 | 10 | 1 | 1 | 0.004646289296  | 6  | 5 | 1 | 1 | -0.091836536815 | 6 | 1 | 1 | 1 | 0.075127271494   |
| 11 | 9  | 1 | 1 | -2.680849551636 | 5  | 5 | 1 | 1 | 0.725274846662  | 5 | 1 | 1 | 1 | -0.103656775891  |
| 10 | 9  | 1 | 1 | 0.119982352873  | 6  | 4 | 1 | 1 | -0.093244770393 | 4 | 1 | 1 | 1 | 0.042910642534   |
| 9  | 9  | 1 | 1 | 2.799934472786  | 5  | 4 | 1 | 1 | -0.128720961461 | 3 | 1 | 1 | 1 | 0.057465277366   |
| 11 | 8  | 1 | 1 | 0.064487063616  | 4  | 4 | 1 | 1 | 0.112316903692  | 2 | 1 | 1 | 1 | -1.168282672595  |
| 10 | 8  | 1 | 1 | -0.128374899932 | 6  | 3 | 1 | 1 | -0.086382876968 | 1 | 1 | 1 | 1 | 176.892485113517 |
| 9  | 8  | 1 | 1 | 0.027156615715  | 5  | 3 | 1 | 1 | -0.046493414937 |   |   |   |   |                  |
